# Supplementary material
Source: Springer Nature journal article supplement (https://www.springermedizin.de/resource/supplementary/12889_2012_5363_MOESM2_ESM.pdf/9495154)

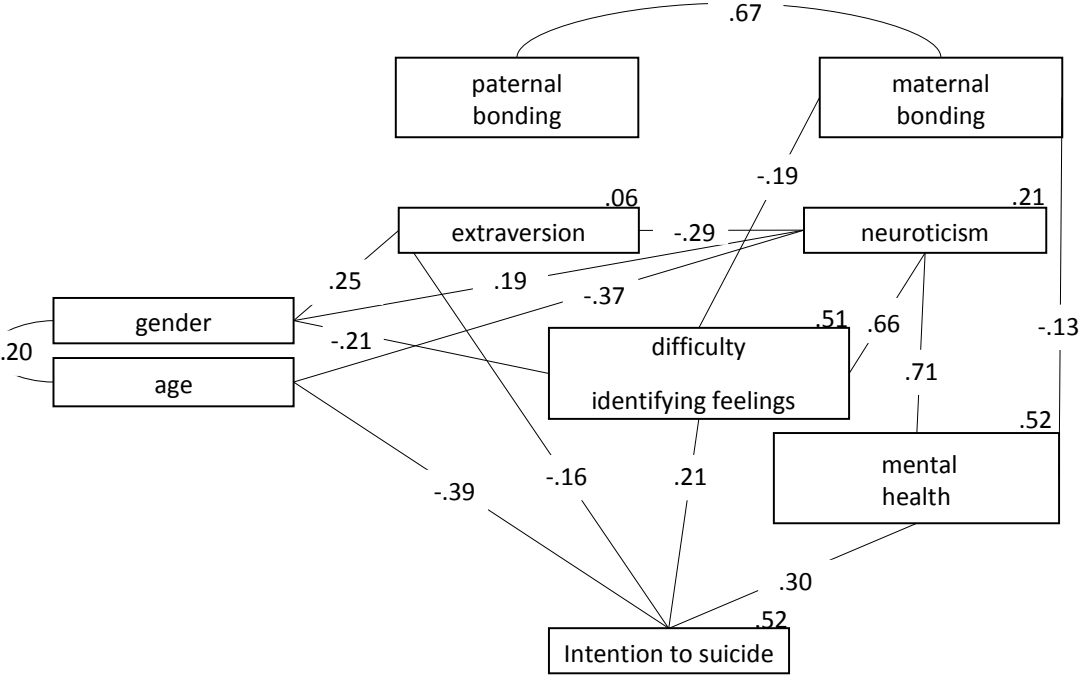

Chi-square= .413  
 df=14  
 p=.413  
 CFI=.998  
 AGFI=.930  
 RMSEA=.017

Supplement: MOESM2 [file 9495154]
